# Supplementary material for: Phenalenyl based platinum anticancer compounds with superior efficacy: design, synthesis, characterization, and interaction with nuclear DNA
Source: Royal Society of Chemistry journal article supplement (doi:10.1039/d0nj06229d), 2021-01-01
Supplement: d0nj06229d1.pdf [file d0nj06229d1.pdf]

**Supporting Information**

**Phenalenyl Based Platinum Anticancer Compounds with Superior Efficacy: Design, Synthesis, Characterization, and Interaction with Nuclear DNA**

Pradip Dutta<sup>[a]</sup>, Smita Kumari<sup>[a]</sup>, Justin Paulraj<sup>[a]</sup>, Rupali Sharma<sup>[a]</sup>, Gonela Vijaykumar<sup>[b]</sup>, Hari Sankar Das<sup>[b]</sup>, Sreejyothi P. <sup>[b]</sup>, Swagata Sil<sup>[b]</sup>, Swadhin K. Mandal<sup>[b]</sup>, Aniruddha Sengupta<sup>[a]\*</sup>, Arindam Sarkar<sup>[a]\*</sup>

*[a] India Innovation Research center*

465 Patparganj Industrial Area, Delhi 110092.

Email: [sararindam@gmail.com](mailto:sararindam@gmail.com), [asengupta@indiainnovationcenter.org](mailto:asengupta@indiainnovationcenter.org)

*[b] Department of Chemical Sciences, Indian Institute of Science Education and Research-Kolkata, Mohanpur -741252, India.*

| Figures/Tables                                                                                                                                                                                                                                                                 | Page No. |
|--------------------------------------------------------------------------------------------------------------------------------------------------------------------------------------------------------------------------------------------------------------------------------|----------|
| <b>Figure S1.</b> a), b), c) <sup>1</sup> H and d), e), f) <sup>195</sup> Pt NMR spectra of compounds <b>1</b> , <b>2</b> and <b>3</b> , respectively                                                                                                                          | 3-4      |
| <b>Figure S2.</b> Mass spectrum of compound <b>1</b> .                                                                                                                                                                                                                         | 5        |
| <b>Figure S3.</b> <sup>13</sup> C NMR spectrum of compound <b>1</b> .                                                                                                                                                                                                          | 5        |
| <b>Figure S4.</b> Mass spec of compound <b>2</b> .                                                                                                                                                                                                                             | 6        |
| <b>Figure S5.</b> <sup>13</sup> C NMR spectrum of compound <b>2</b> .                                                                                                                                                                                                          | 6        |
| <b>Figure S6.</b> Mass spectrum of compound <b>3b</b> .                                                                                                                                                                                                                        | 7        |
| <b>Figure S7.</b> <sup>1</sup> H NMR spectrum of compound <b>3b</b> .                                                                                                                                                                                                          | 7        |
| <b>Figure S8.</b> <sup>13</sup> C NMR spectrum of compound <b>3b</b> .                                                                                                                                                                                                         | 8        |
| <b>Figure S9.</b> Mass spectrum of compound <b>3c</b> .                                                                                                                                                                                                                        | 8        |
| <b>Figure S10.</b> <sup>1</sup> H NMR spectrum of compound <b>3c</b> .                                                                                                                                                                                                         | 9        |
| <b>Figure S11.</b> <sup>13</sup> C NMR spectrum of compound <b>3c</b> .                                                                                                                                                                                                        | 9        |
| <b>Figure S12.</b> Mass spectrum of compound <b>3c</b> .                                                                                                                                                                                                                       | 10       |
| <b>Figure S13.</b> <sup>1</sup> H NMR spectrum of compound <b>3c</b> .                                                                                                                                                                                                         | 10       |
| <b>Figure S14.</b> Mass spectrum of compound <b>3</b> .                                                                                                                                                                                                                        | 11       |
| <b>Figure S15.</b> <sup>13</sup> C NMR spectrum of compound <b>3</b> .                                                                                                                                                                                                         | 11       |
| <b>Figure S16.</b> HPLC profile of compound <b>3</b> .                                                                                                                                                                                                                         | 12       |
| <b>Figure S17.</b> Emission spectra of a) compound <b>1</b> , b) compound <b>2</b> and c) compound <b>3</b> in their respective $\gamma_{\max}$ of excitation wavelengths 420 nm (for <b>1</b> ), 600 nm (for <b>2</b> ) and 440 nm (for <b>3</b> ).                           | 12       |
| <b>Figure S18.</b> Morphology of A549 cells following treatment with compounds for 24 hours. <b>(A)</b> untreated, <b>(B)</b> compound <b>1</b> , <b>(C)</b> compound <b>2</b> , <b>(D)</b> compound <b>3</b> . Scale bar 20 $\mu\text{m}$ .                                   | 12       |
| <b>Figure S19.</b> Fluorescence intensity in A549 cells post treatment with compounds. <b>(A)</b> compound <b>1</b> ; <b>(B)</b> compound <b>2</b> ; <b>(C)</b> compound <b>3</b> . Scale bar 20 $\mu\text{m}$ .                                                               | 13       |
| <b>Figure S20.</b> Representative images showing morphological changes of A549 nuclei. <b>(A)</b> untreated cells, showing normal nuclei; <b>(B)</b> cells treated with compound <b>1</b> show ring or necklace nuclear condensation (arrowhead). Scale bar 10 $\mu\text{m}$ . | 13       |
| <b>Figure S21.</b> <sup>1</sup> H NMR monitoring of compound <b>1</b> in presence of PBS                                                                                                                                                                                       | 14       |
| <b>Figure S22.</b> <sup>1</sup> H NMR monitoring of compound <b>1</b> in presence of 5'-GMP                                                                                                                                                                                    | 15       |
| <b>Figure S23.</b> Mass spectrum of the reaction mixture of compound <b>1</b> and 5'-GMP                                                                                                                                                                                       | 15       |
| <b>Table S1.</b> Crystal data and structure refinement for complex <b>1</b> .                                                                                                                                                                                                  | 16       |

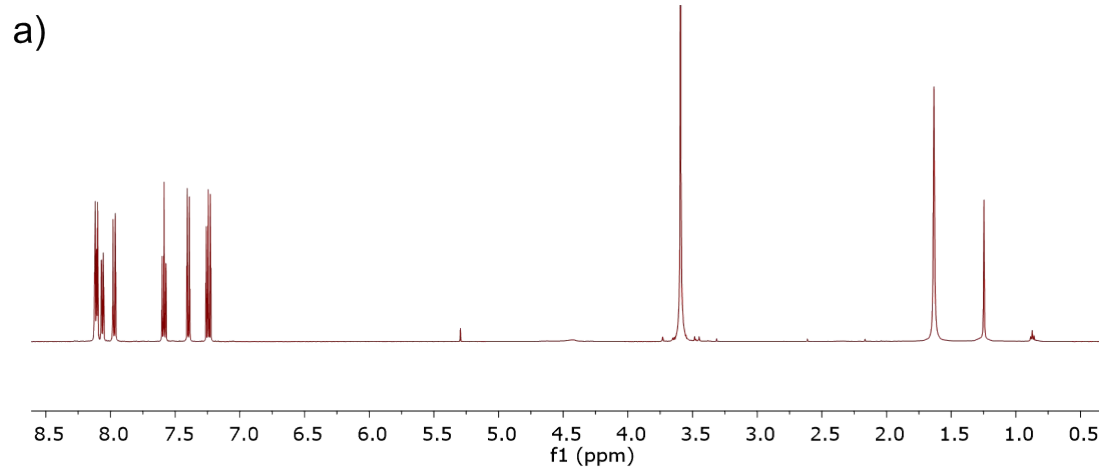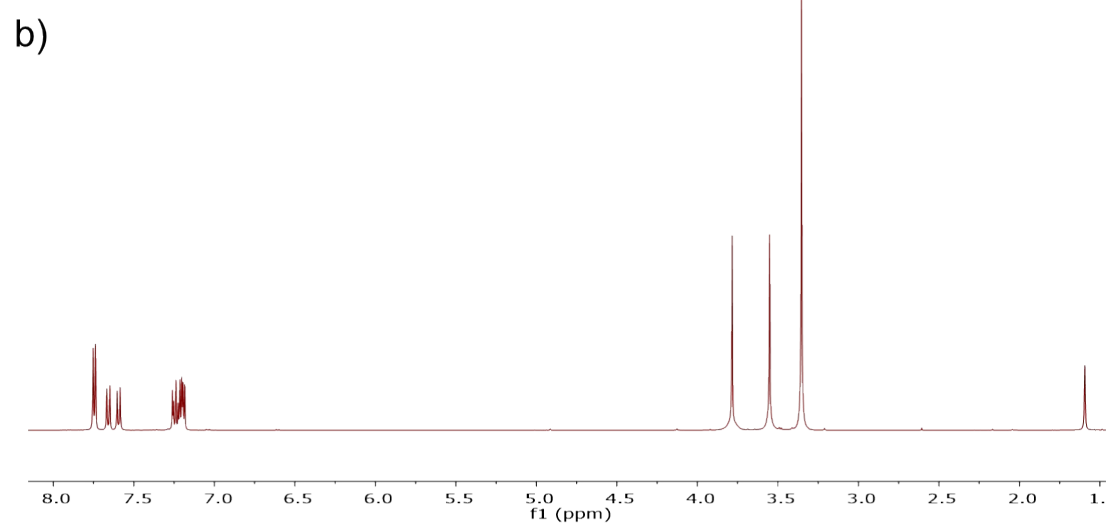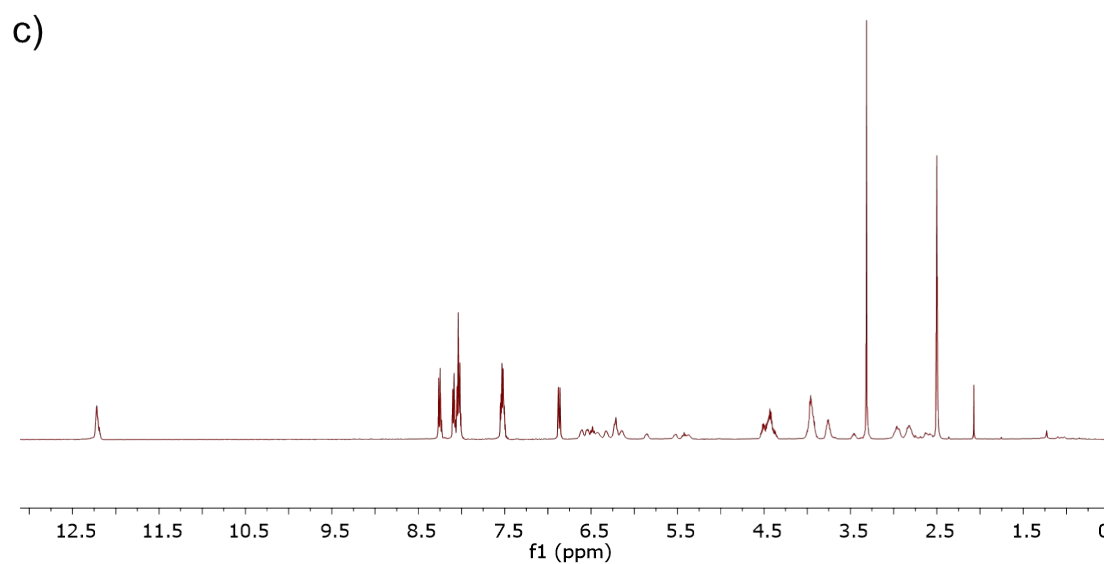

d)

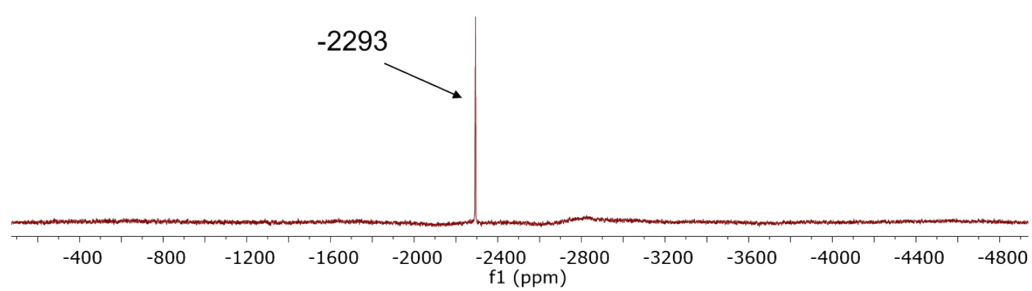

e)

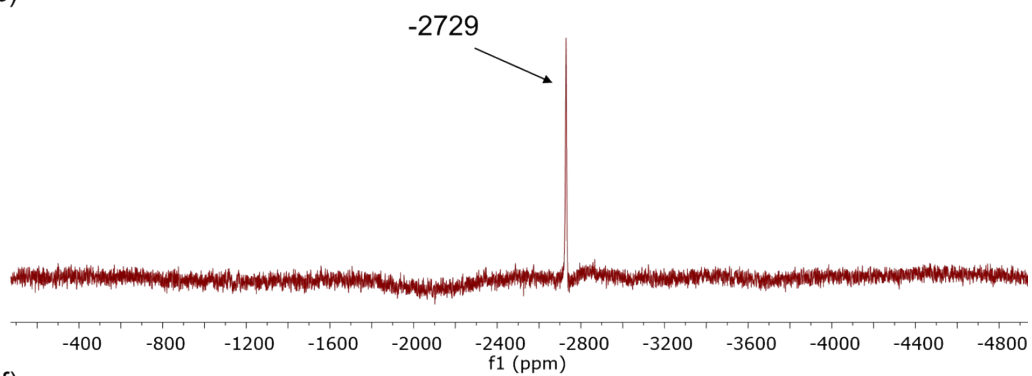

f)

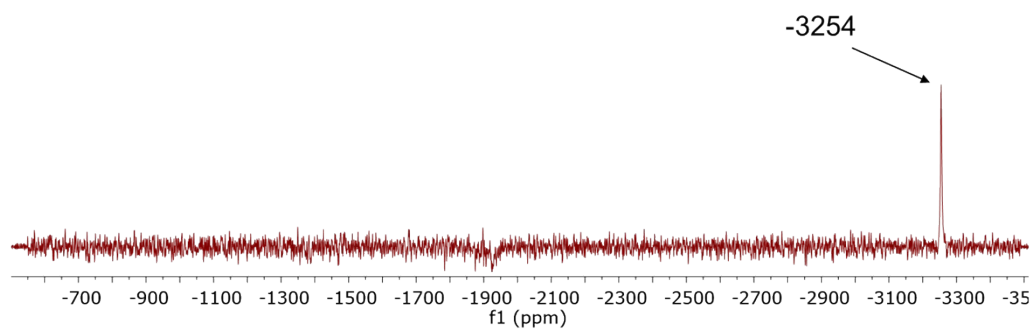

**Figure S1.** a), b), c)  $^1\text{H}$  and d), e), f)  $^{195}\text{Pt}$  NMR spectra of compounds **1**, **2** and **3**, respectively.

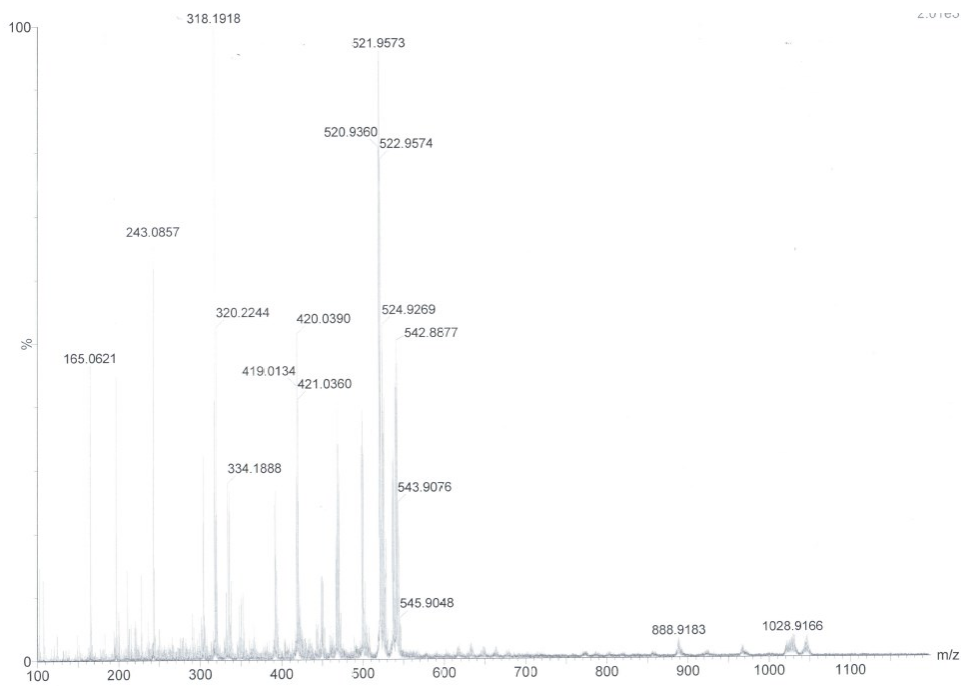

**Figure S2.** Mass spectrum of compound 1.

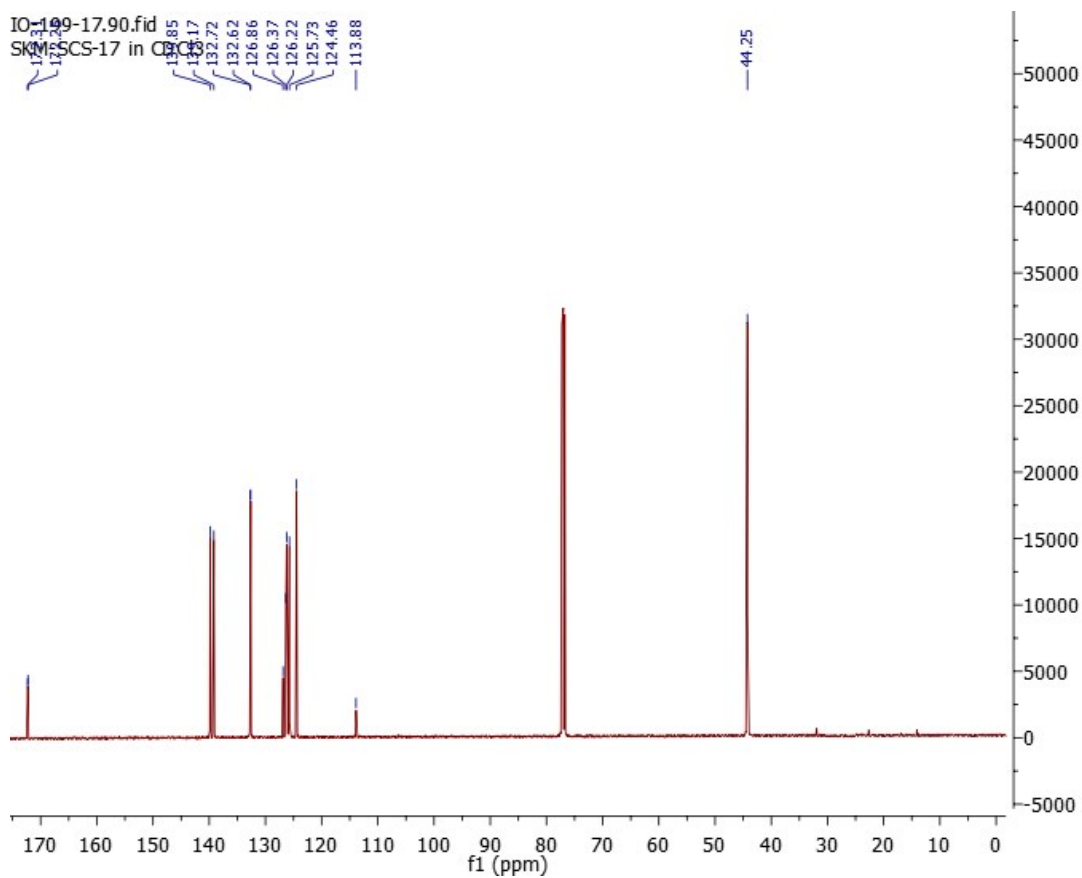

**Figure S3.** <sup>13</sup>C NMR spectrum of compound 1.

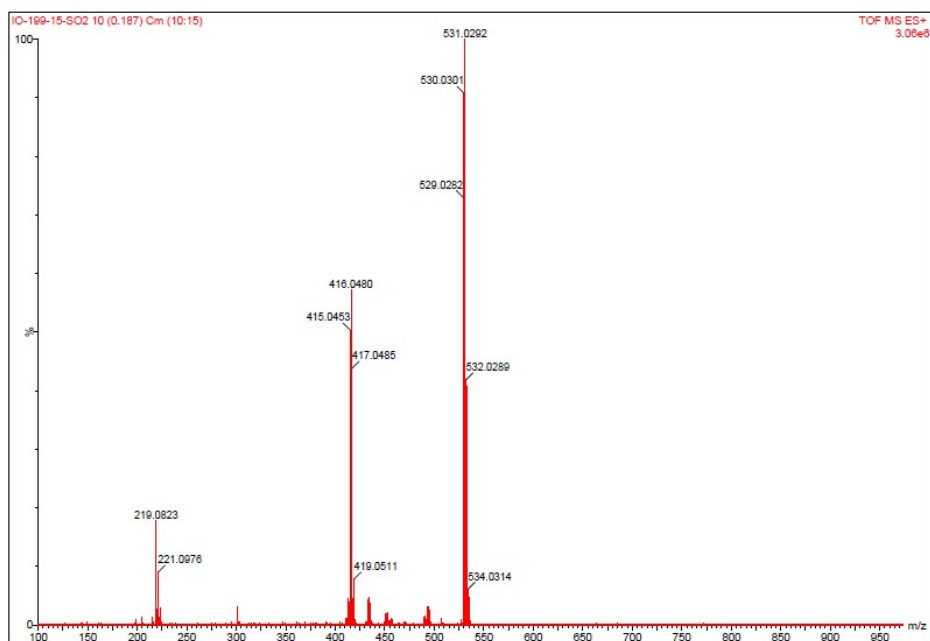

**Figure S4.** Mass spectrum of compound 2.

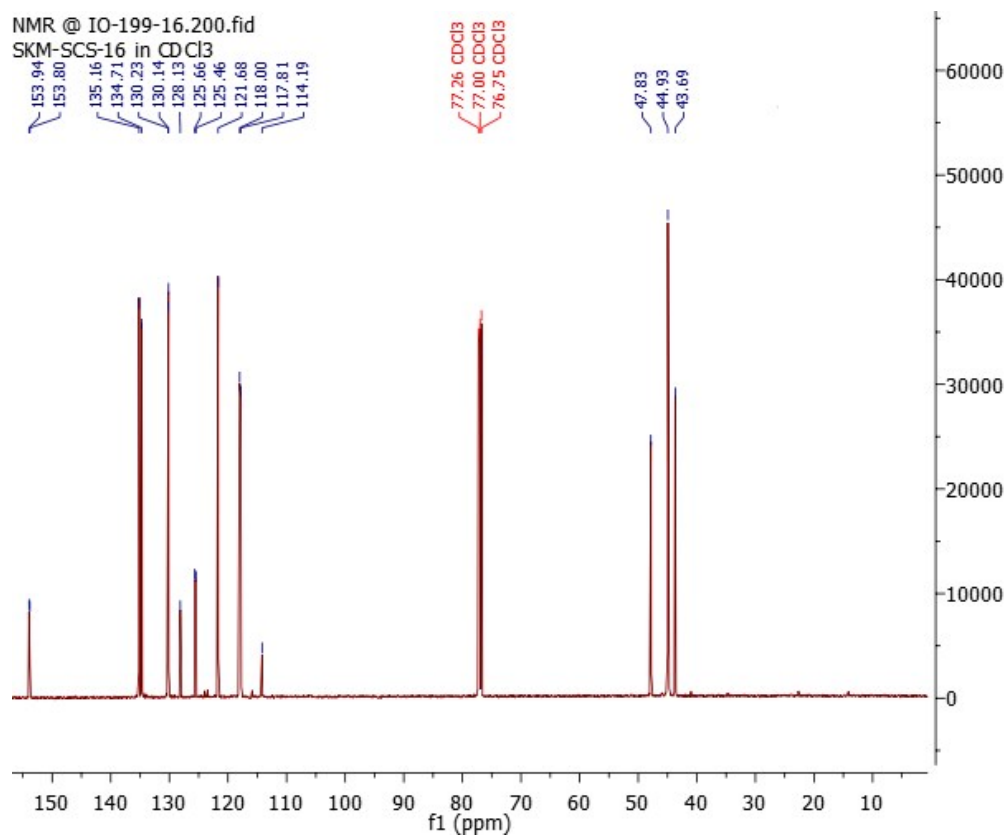

**Figure S5.**  $^{13}\text{C}$  NMR spectrum of compound 2.

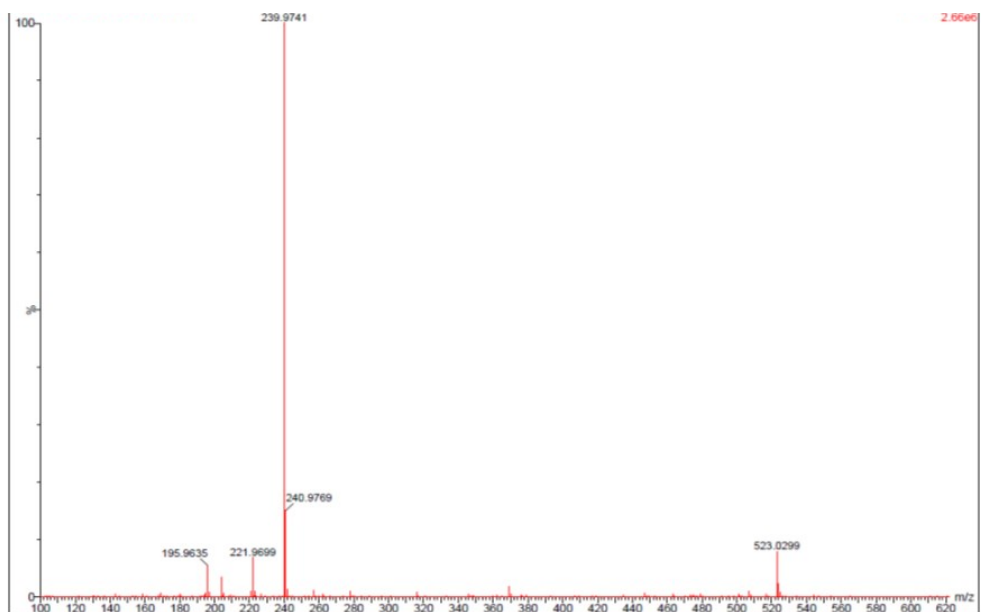

**Figure S6.** Mass spectrum of compound **3b**.

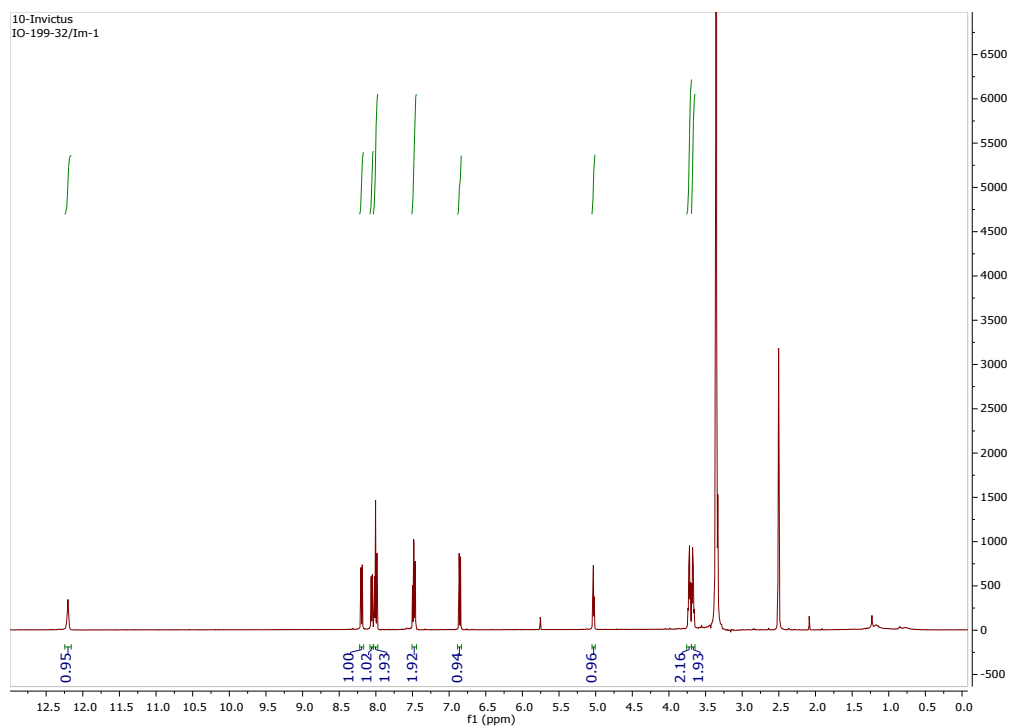

**Figure S7.** <sup>1</sup>H NMR spectrum of compound **3b**.

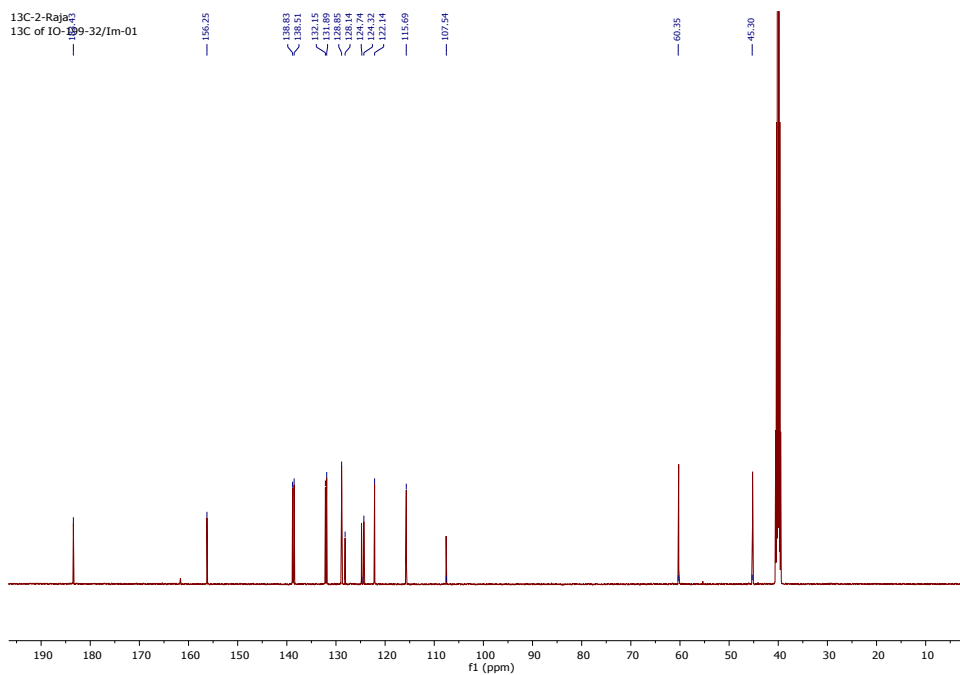

Figure S8.  $^{13}\text{C}$  NMR spectrum of compound **3b**.

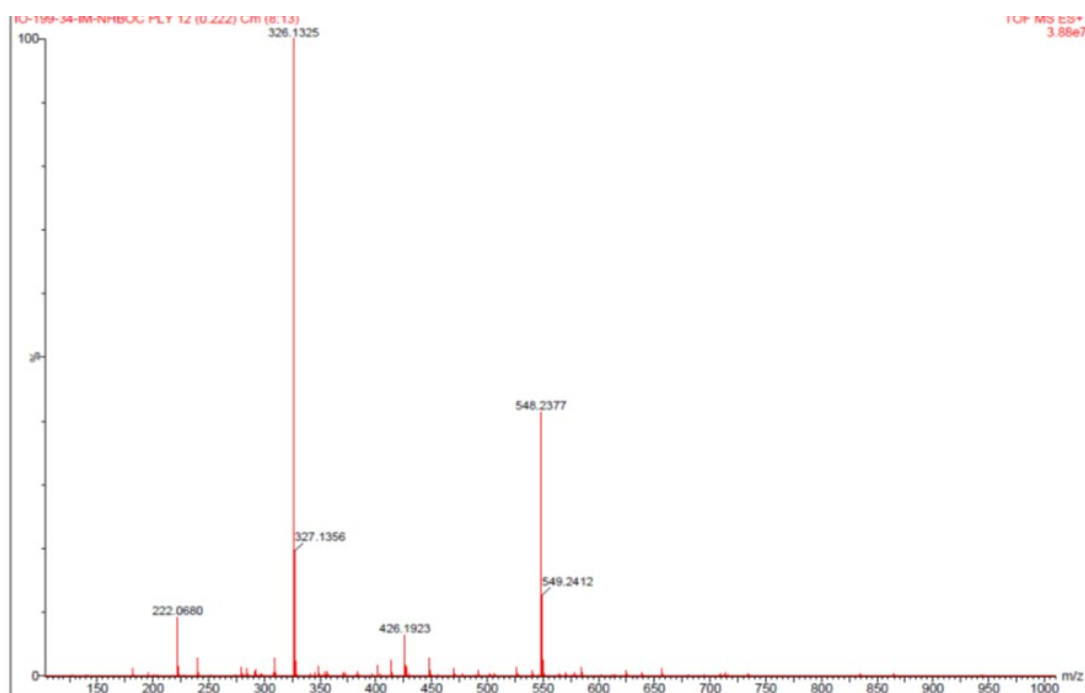

Figure S9. Mass spectrum of compound **3c**.



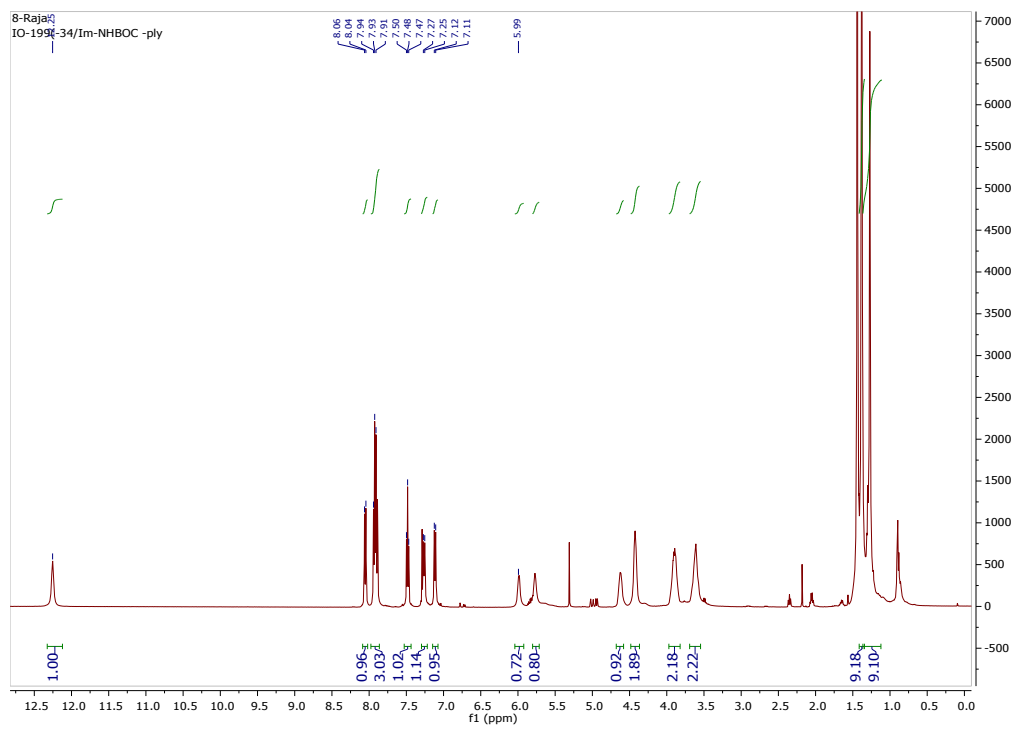

**Figure S10.**  $^1\text{H}$  NMR spectrum of compound **3c**.

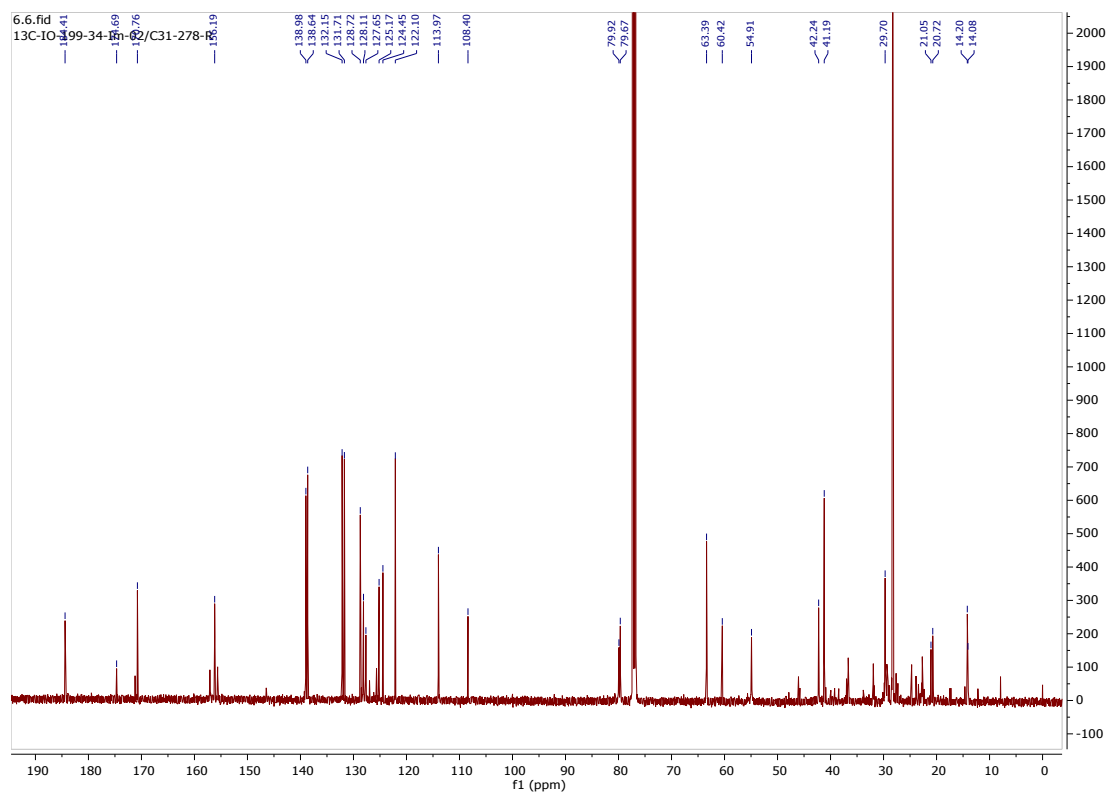

**Figure S11.**  $^{13}\text{C}$  NMR spectrum of compound **3c**.

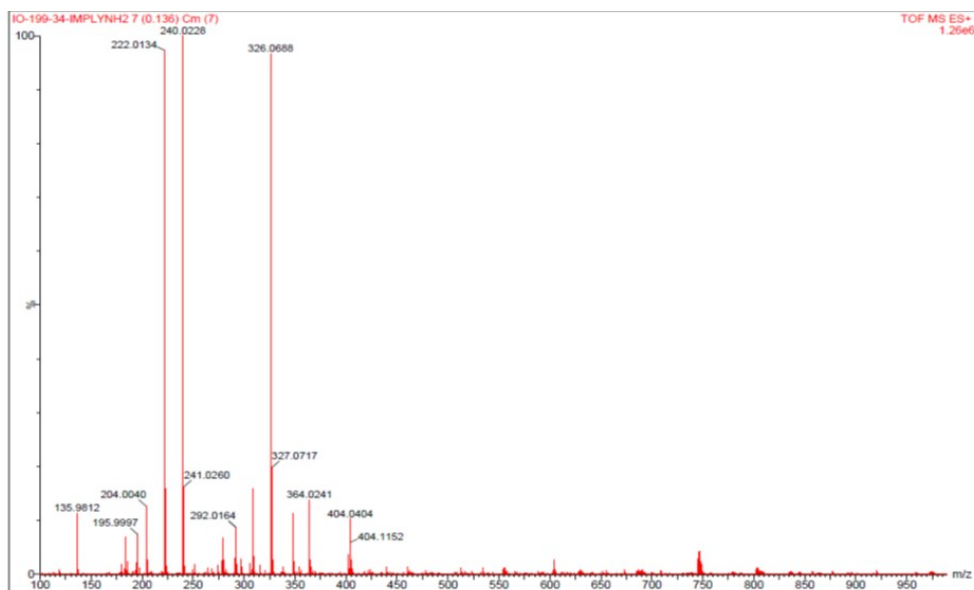

Figure S12. Mass spectrum of compound 3c.

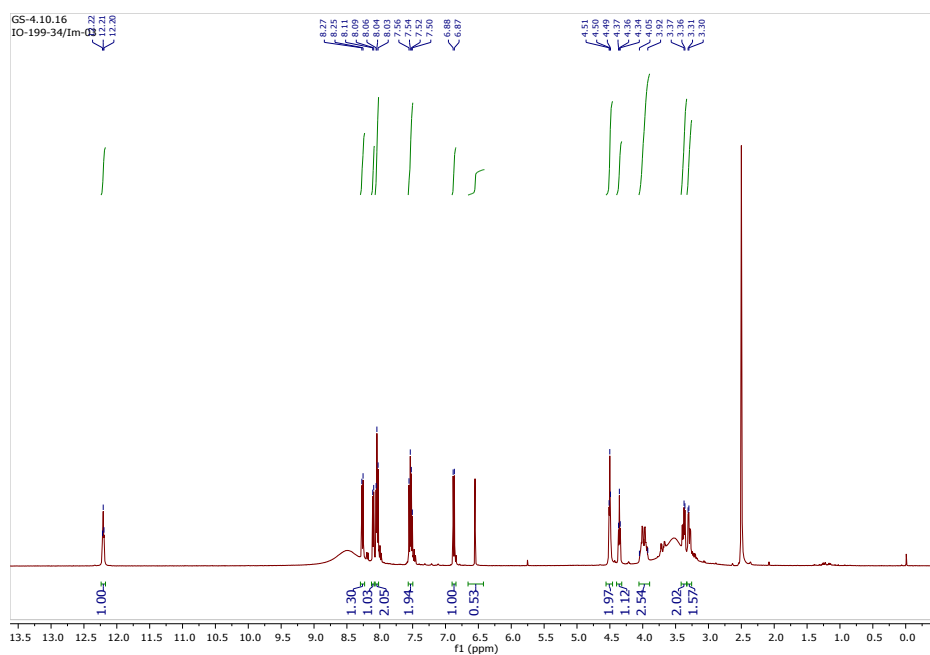

Figure S13. <sup>1</sup>H NMR spectrum of compound 3c.

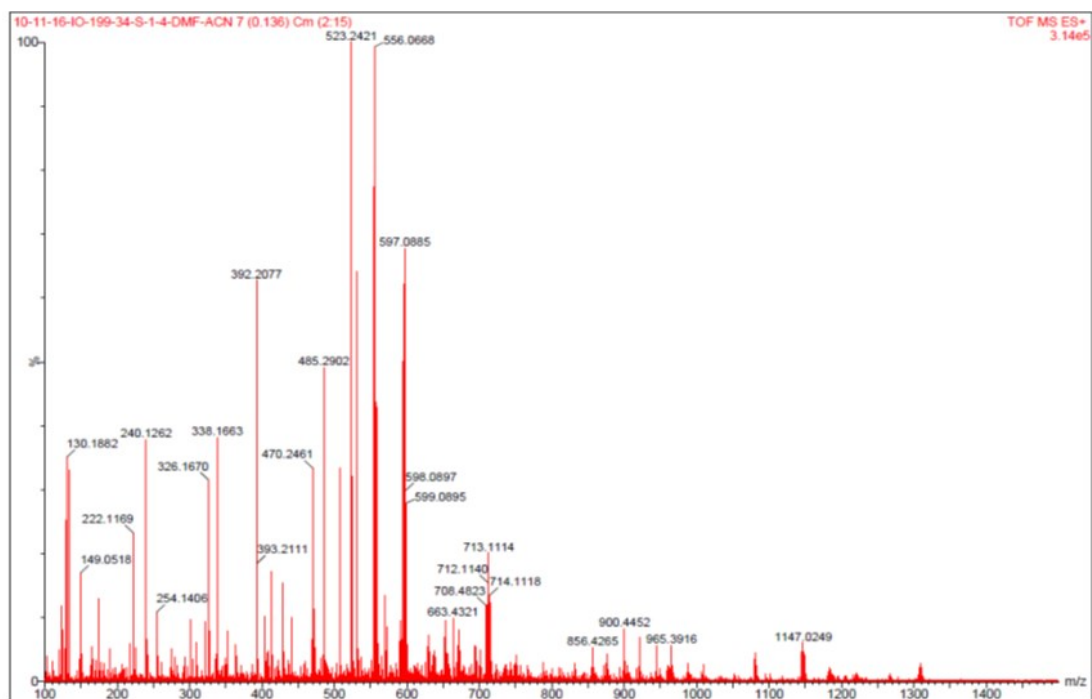

Figure S14. Mass spectrum of compound 3.

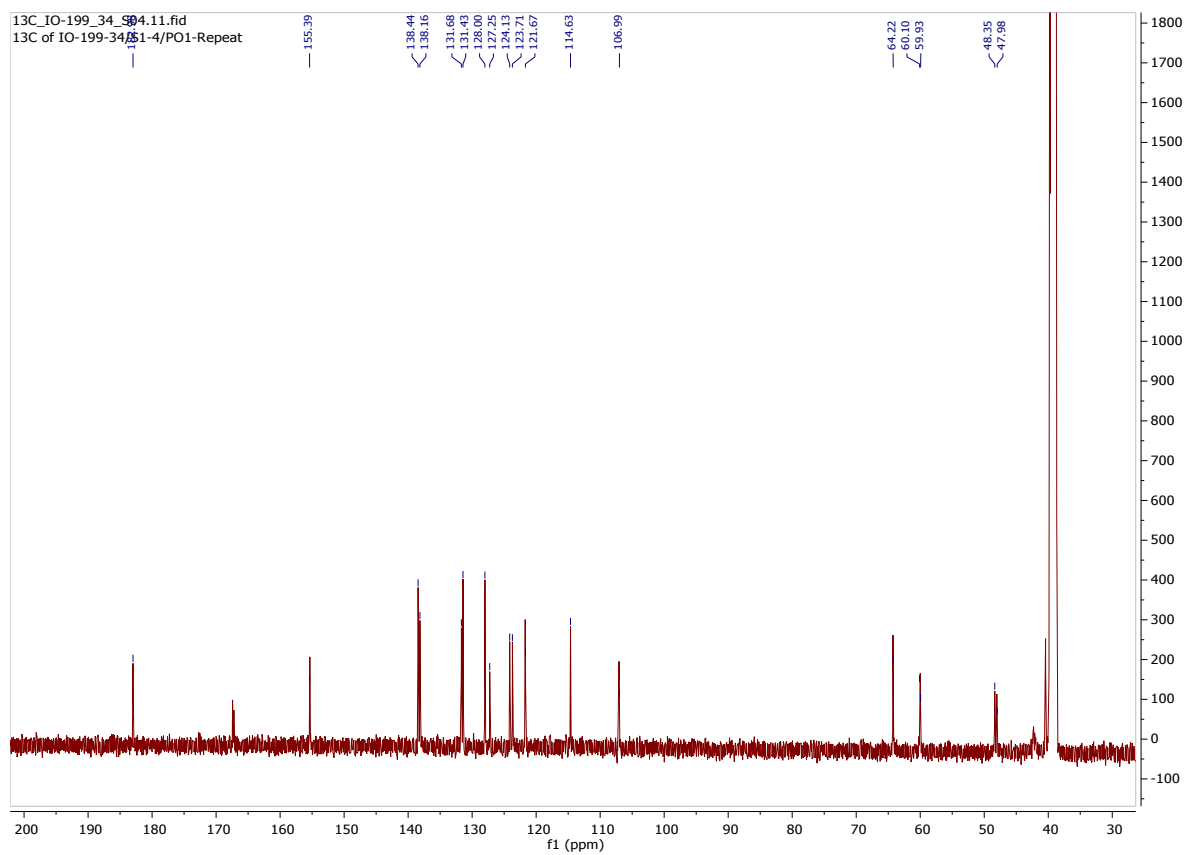

Figure S15. <sup>13</sup>C NMR spectrum of compound 3.

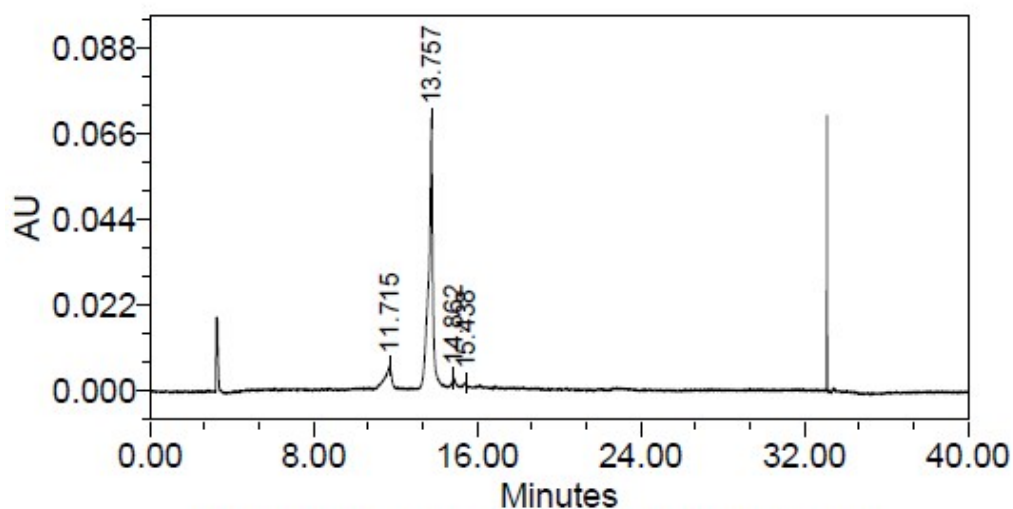

— Channel Description 2998 Ch2 440nm@1.2nm

Peak Results

|   | RT     | Area   | Height | % Area | Total Area |
|---|--------|--------|--------|--------|------------|
| 1 | 11.715 | 113818 | 5430   | 10.68  | 1065849    |
| 2 | 13.757 | 927475 | 68705  | 87.02  | 1065849    |
| 3 | 14.862 | 17330  | 2067   | 1.63   | 1065849    |
| 4 | 15.438 | 7225   | 1037   | 0.68   | 1065849    |

**Figure S16.** HPLC profile of compound **3**.

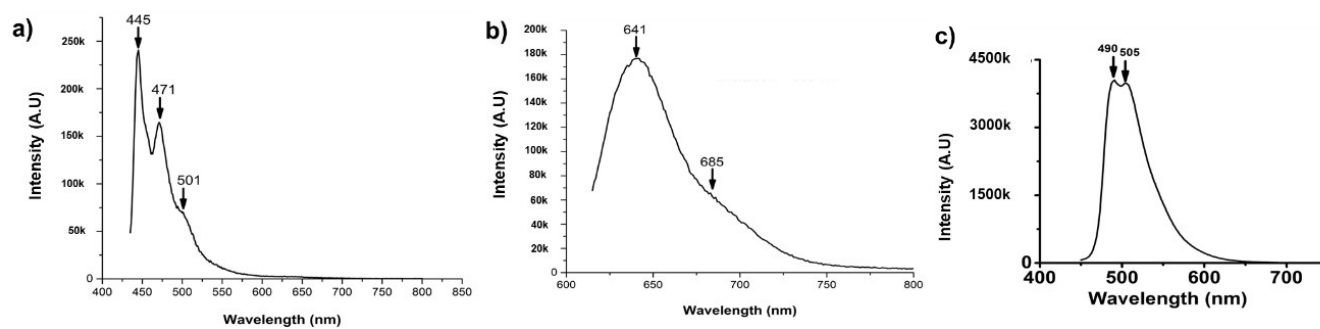

**Figure S17.** Emission spectra of a) compound **1**, b) compound **2** and c) compound **3** in their respective  $\gamma_{\max}$  of excitation wavelengths 420 nm (for **1**), 600 nm (for **2**) and 440 nm (for **3**).

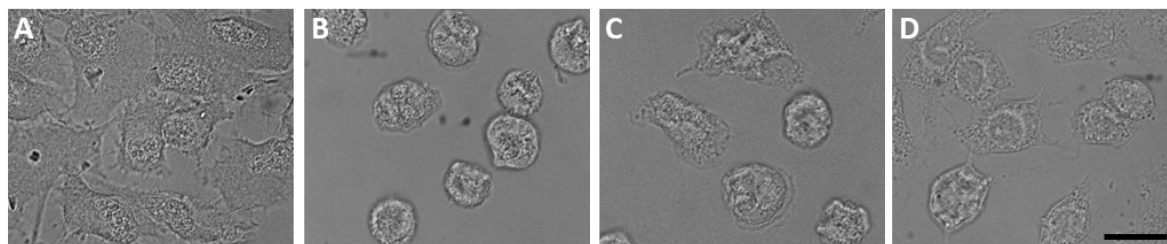

**Figure S18.** Morphology of A549 cells following treatment with compounds for 24 hours. (A) untreated, (B) compound **1**, (C) compound **2**, (D) compound **3**. Scale bar 20  $\mu\text{m}$ .

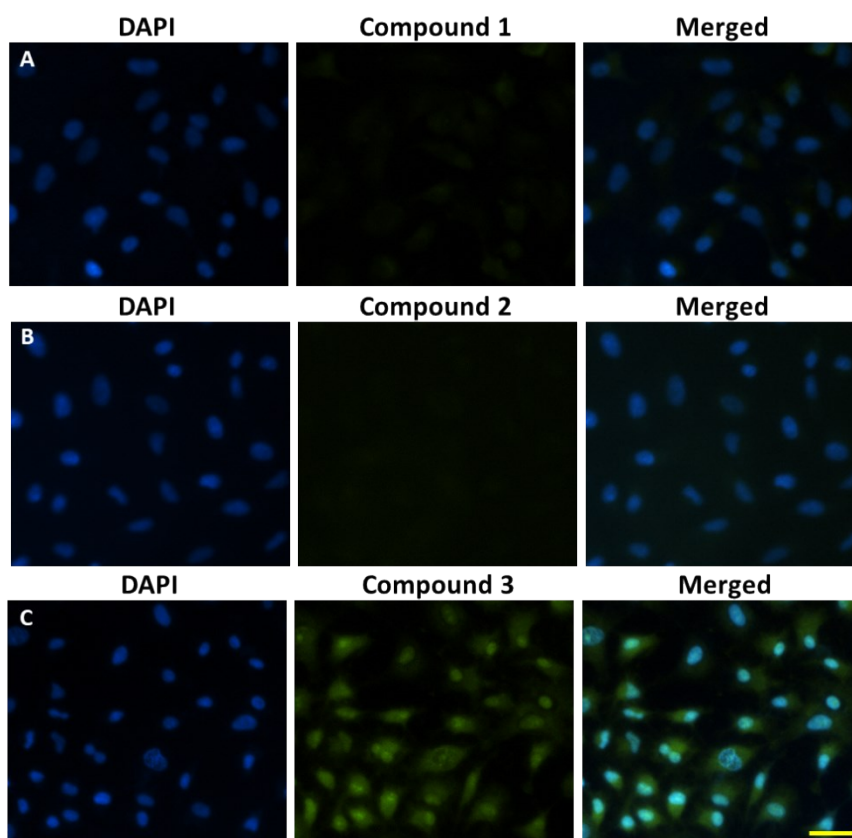

**Figure S19.** Fluorescence intensity in A549 cells post treatment with compounds. (A) compound 1; (B) compound 2; (C) compound 3. Scale bar 20  $\mu\text{m}$ .

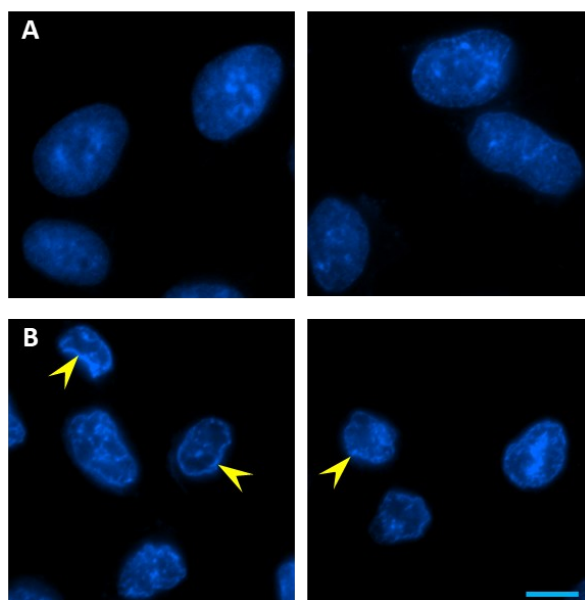

**Figure S20.** Representative images showing morphological changes of A549 nuclei. (A) untreated cells, showing normal nuclei; (B) cells treated with compound 1 show ring or necklace nuclear condensation (arrowhead). Scale bar 10  $\mu\text{m}$ .

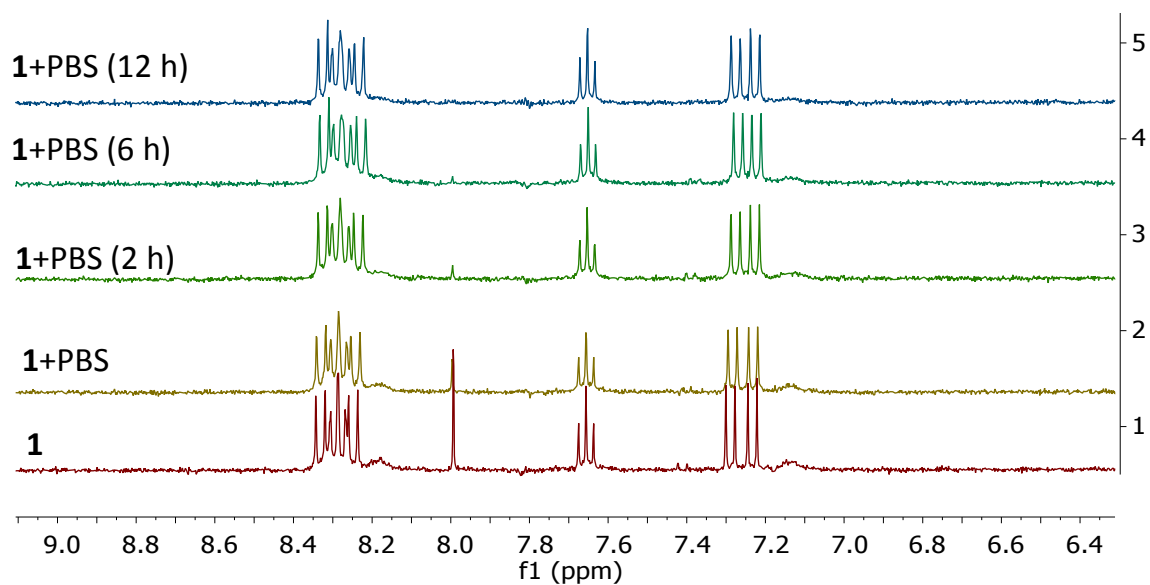

**Figure S21.**  $^1\text{H}$  NMR monitoring of compound **1** in presence of PBS.

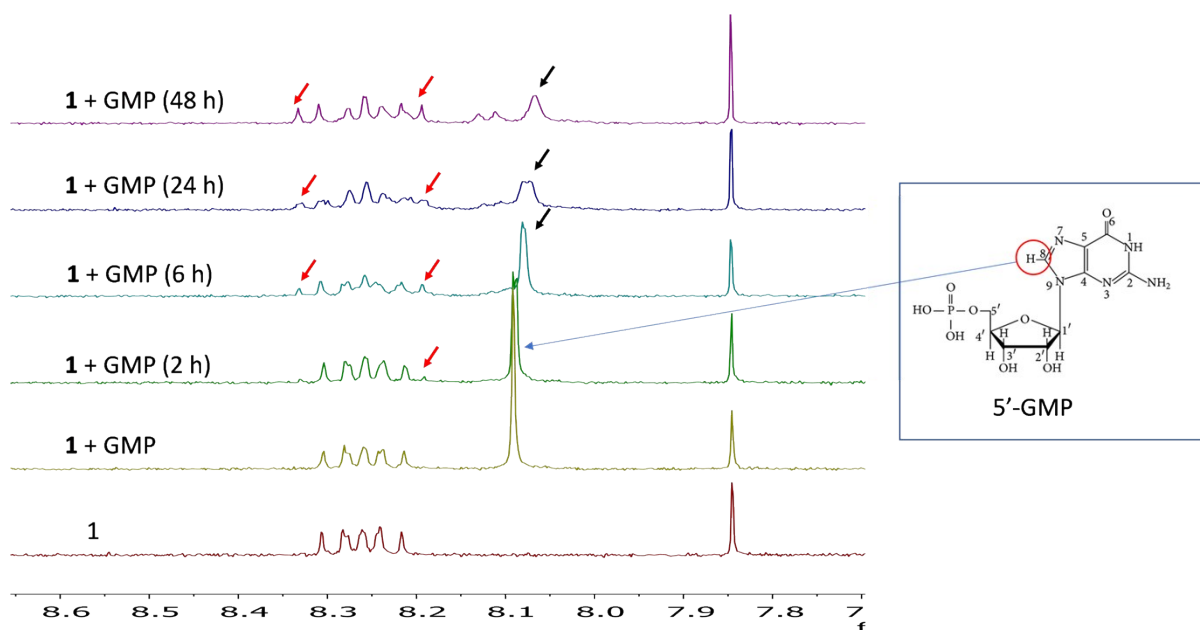

**Figure S22.**  $^1\text{H}$  NMR monitoring of compound **1** in presence of 5'-GMP. (Black arrow indicates the change in H8 of 5'-GMP and Red arrows indicate the appearance of new peak after 2 h of 5'-GMP addition).

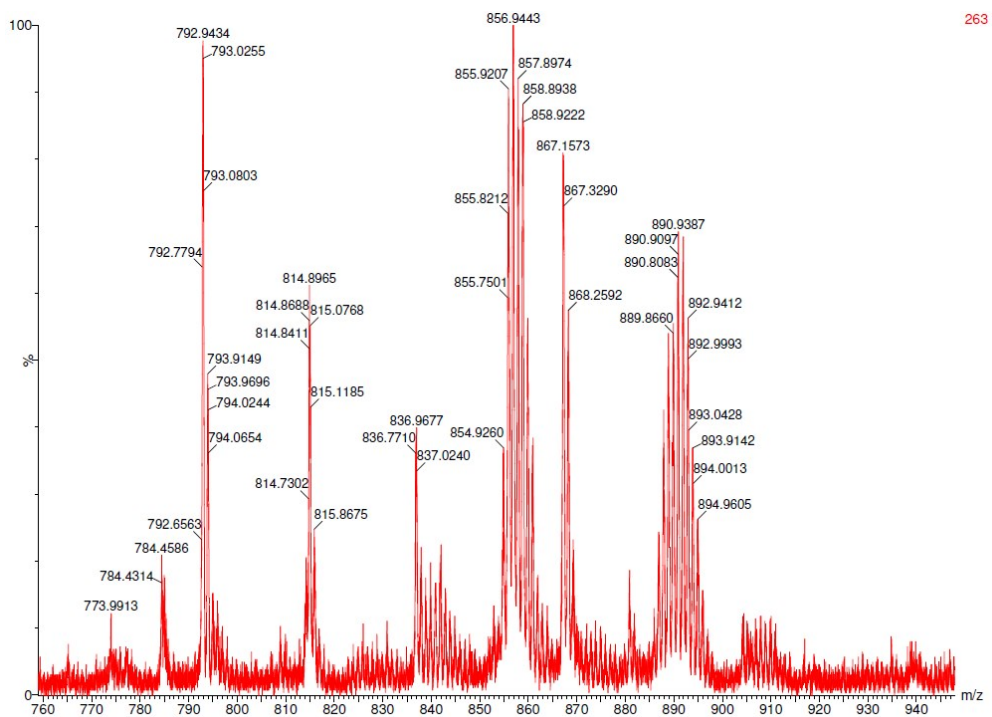

**Figure S23.** Mass spectrum of the reaction mixture of compound **1** and 5'-GMP

**Table S1.** Crystal data and structure refinement for complex **1**.

|                                             |                                                                                               |
|---------------------------------------------|-----------------------------------------------------------------------------------------------|
| Empirical formula                           | C <sub>31</sub> H <sub>27</sub> Cl <sub>5</sub> O <sub>6</sub> Pt <sub>2</sub> S <sub>2</sub> |
| Formula weight                              | 1127.08                                                                                       |
| Temperature/K                               | 293(2)                                                                                        |
| Crystal system                              | orthorhombic                                                                                  |
| Space group                                 | P2 <sub>1</sub> 2 <sub>1</sub> 2 <sub>1</sub>                                                 |
| a/Å                                         | 13.4285(7)                                                                                    |
| b/Å                                         | 15.7599(9)                                                                                    |
| c/Å                                         | 16.4621(9)                                                                                    |
| α/°                                         | 90.00                                                                                         |
| β/°                                         | 90.00                                                                                         |
| γ/°                                         | 90.00                                                                                         |
| Volume/Å <sup>3</sup>                       | 3483.9(3)                                                                                     |
| Z                                           | 4                                                                                             |
| ρ <sub>calc</sub> /g/cm <sup>3</sup>        | 2.149                                                                                         |
| μ/mm <sup>-1</sup>                          | 8.568                                                                                         |
| F(000)                                      | 2136.0                                                                                        |
| Crystal size/mm <sup>3</sup>                | 0.6 × 0.4 × 0.2                                                                               |
| Radiation                                   | MoKα (λ = 0.71073)                                                                            |
| 2θ range for data collection/°              | 4.7 to 52.74                                                                                  |
| Index ranges                                | -15 ≤ h ≤ 16, -19 ≤ k ≤ 19, -20 ≤ l ≤ 19                                                      |
| Reflections collected                       | 22167                                                                                         |
| Independent reflections                     | 7112 [R <sub>int</sub> = 0.0536, R <sub>sigma</sub> = 0.0612]                                 |
| Data/restraints/parameters                  | 7112/0/419                                                                                    |
| Goodness-of-fit on F <sup>2</sup>           | 1.069                                                                                         |
| Final R indexes [ >=2σ (I)]                 | R <sub>1</sub> = 0.0408, wR <sub>2</sub> = 0.0799                                             |
| Final R indexes [all data]                  | R <sub>1</sub> = 0.0690, wR <sub>2</sub> = 0.0897                                             |
| Largest diff. peak/hole / e Å <sup>-3</sup> | 0.64/-1.40                                                                                    |
| Flack parameter                             | -0.007(5)                                                                                     |
